# Supplementary material for: Fabrication of a ZnO nanogenerator for eco-friendly biomechanical energy harvesting
Source: Royal Society of Chemistry journal article supplement (doi:10.1039/c3ra40447a), 2013-01-01
Supplement: c3ra40447a.pdf [file c3ra40447a.pdf]

## Electronic Supplementary Material

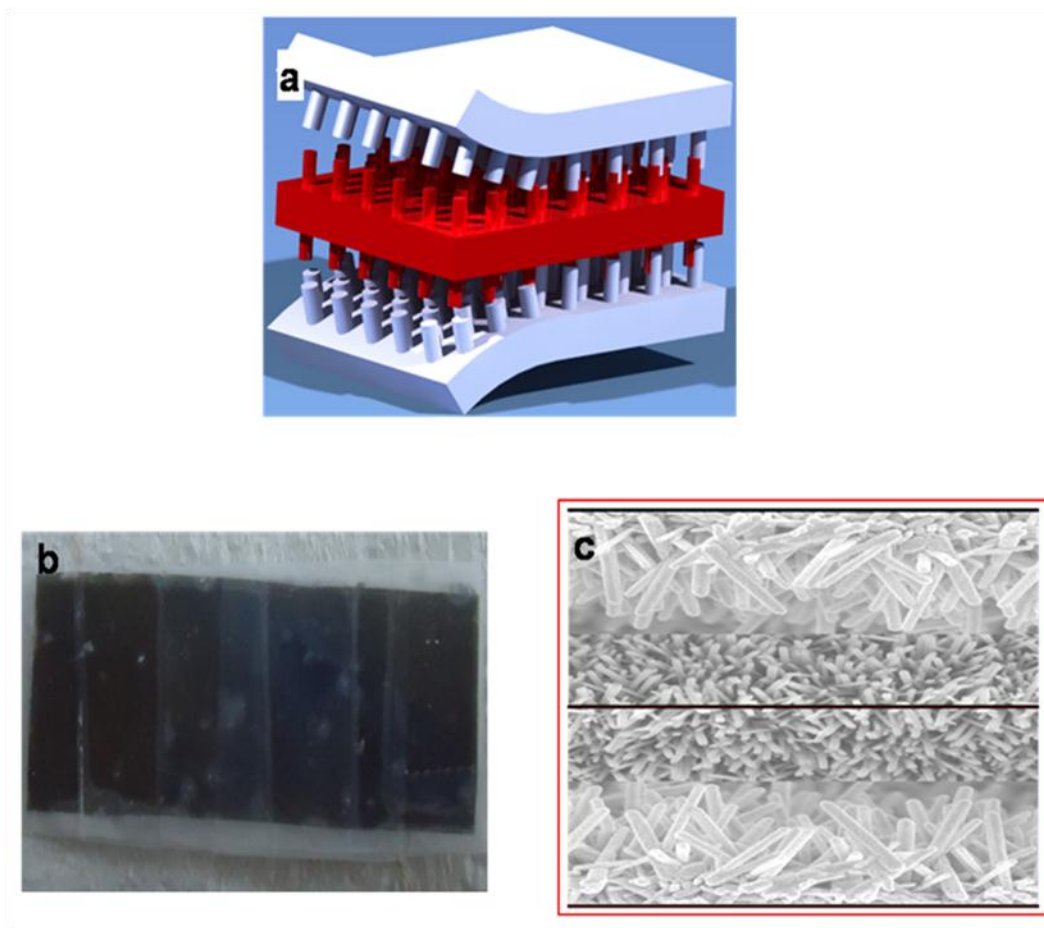

**Fig. S.1** a) 3D Schematic representation of the fabricated nanogenerator device. b) Digital image of the real device. c) FESEM image of interface depiction.

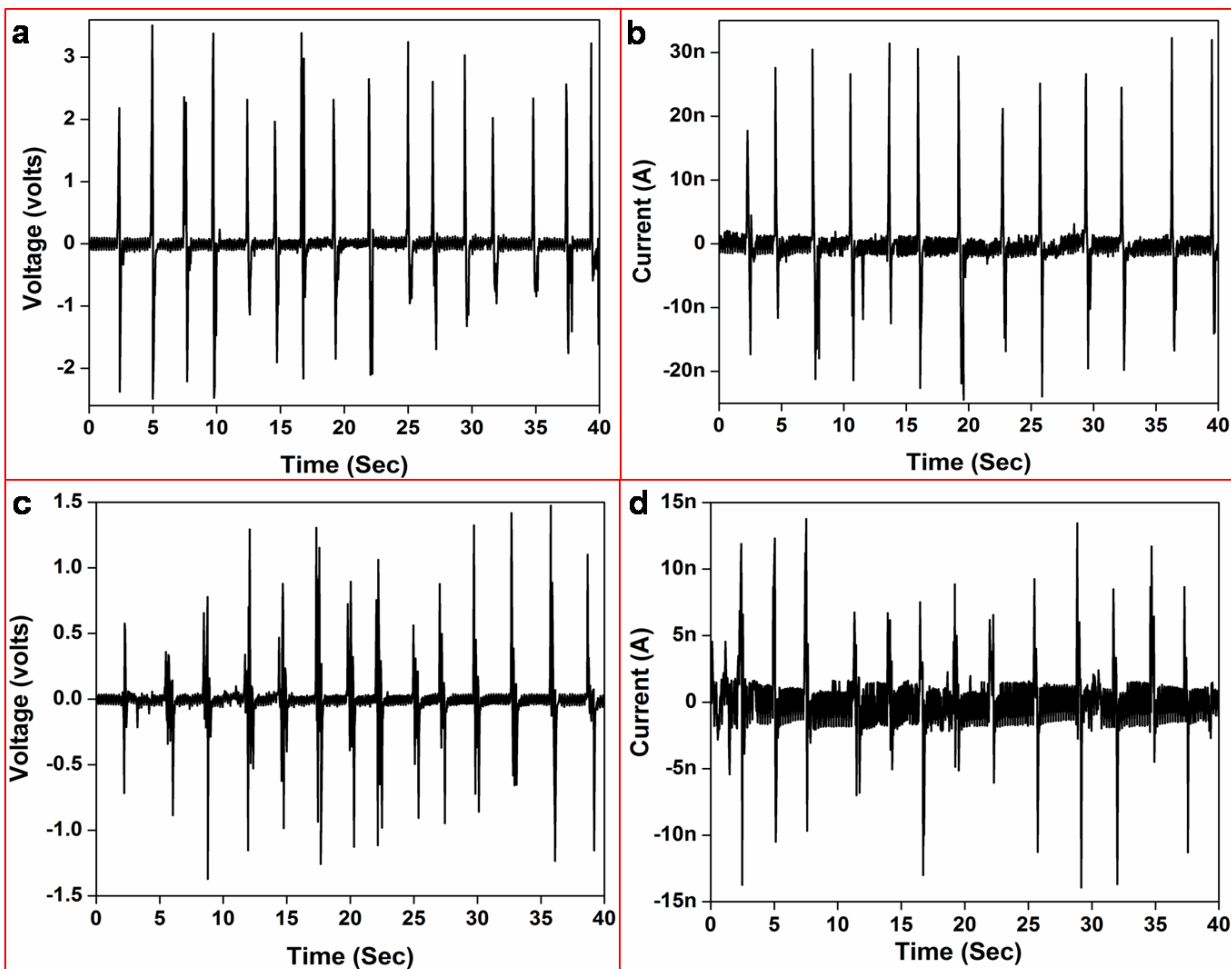

**Fig. S.2** Electrical measurements of the nanogenerator device, a) open circuit voltage, and b) short circuit current of the PDMS device during the multiple folding and releasing of nanogenerator by fingers. c) Open circuit voltage, and d) short circuit current of the PET device during the multiple folding and releasing of nanogenerator by fingers.

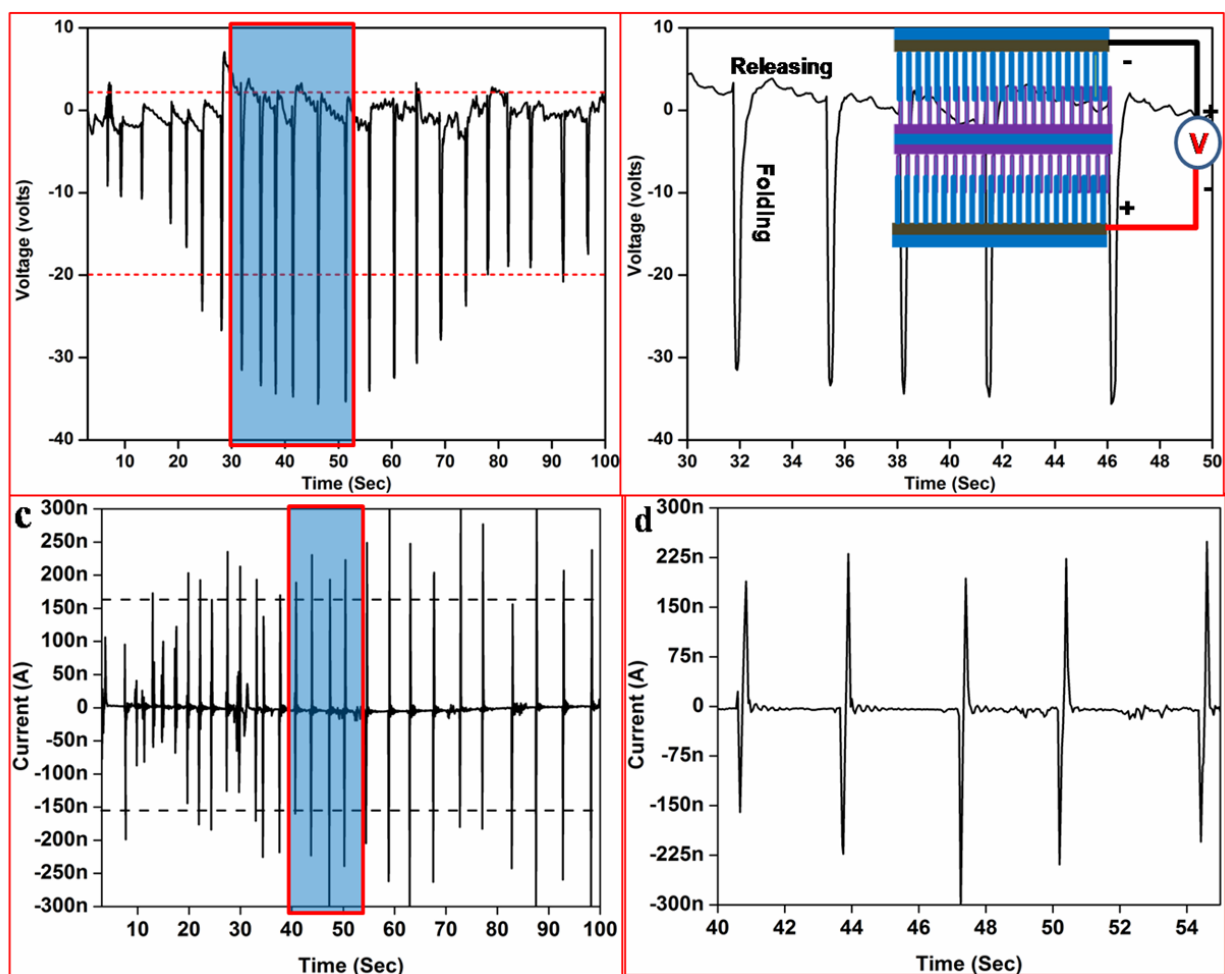

**Fig. S.3** Electrical measurement of the nanogenerator device, a) digital image of nanogenerator device when folding and releasing using hand, b) open circuit voltage of the device the during multiple folding and releasing, and c) the enlarged view of the boxed area of voltage and schematic diagram of biased condition (inset), d) closed circuit current of the device during the multiple folding and releasing, and e) the enlarged view of the boxed area of current.

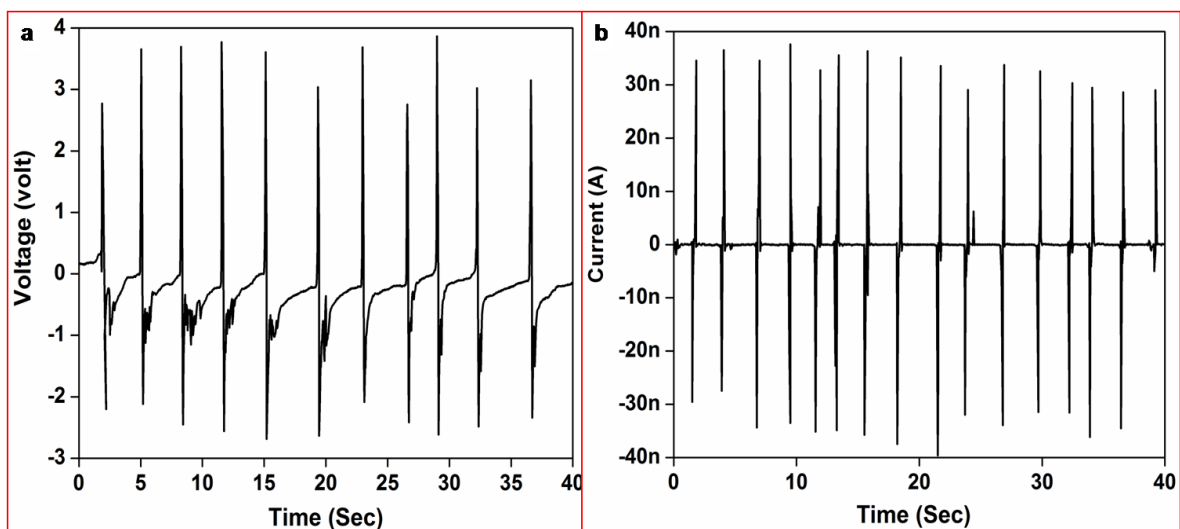

**Fig. S.4** Electrical measurement of the nanogenerator device with flat electrode, a) open circuit voltage, and b) short circuit current during the multiple folding and releasing of nanogenerator.

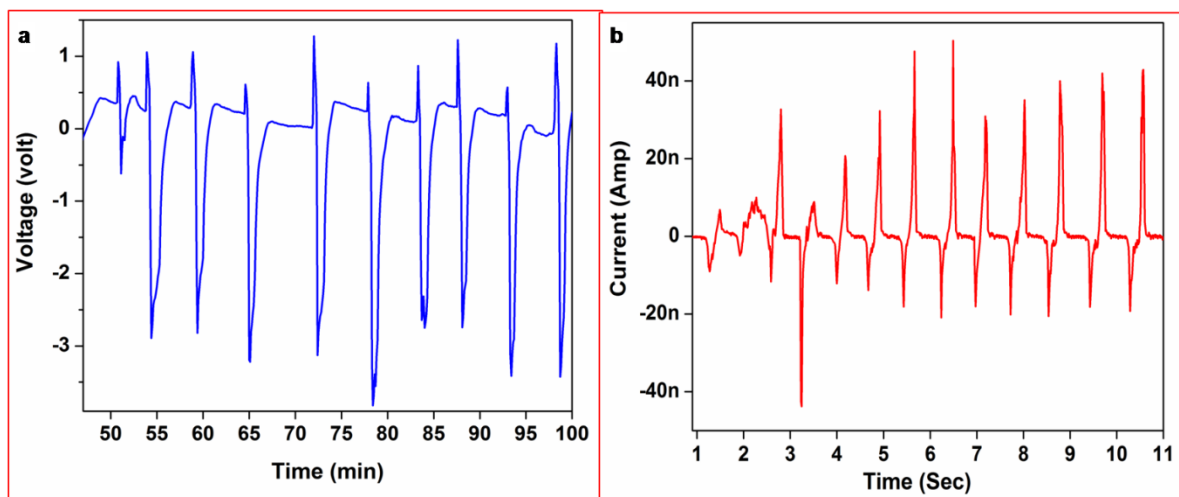

**Fig. S.5** Electrical measurement of the nanogenerator device with Au coated ZnO nanowire electrode without PDMS, a) open circuit voltage and, b) short circuit current during the multiple folding and releasing of nanogenerator.
